# Supplementary material
Source: PubMed Central journal article supplement (PMC7124895)
Supplement: tpmd190408.SD1.pdf [file tpmd190408.SD1.pdf]

The following are supplemental materials and will be published online only

## **Supplemental Information**

### **List of speakers with affiliations**

- Abdel Hady: Cancer Biology department , National Cancer Institute, Cairo University
- Ahmad Farouk: Orodental Genetics department, Human Genetics and Genome Research division, National Research Centre, Egypt.
- Ambroise Wonkam: Human Genetics Division, Faculty of Health Sciences, University of Cape Town
- Amir Salem: National Research Centre, Egypt
- Ananyo Choudhury: Sydney Brenner Institute of Molecular Biosciences, University of the Witwatersrand, Johansberg
- Ayo Doumatey: The Center for Research on Genomics and Global Health (CRGGH), National Human Genome Research Institute (NHGRI), National Institute of Health (NIH), USA
- Bazondile Dube-Marimbe:
- Celeste Bento: Congenital Red Blood Cell Diseases Unit, University Hospital, Combria, Portugal.
- Charles Rotimi: Head of the Center for Research on Genomics and Global Health (NHGRI, NIH, USA)
- Collen Masimirembwa: African Institute of Biomedical Science and Technology (AiBST)
- Faisal Fadlelmola:
- Filippo Rosselli: Gustave-Roussy Institute, Paris, France.
- Ghada Abdel-Salam: Clinical Genetics department, Human Genetics and Genome Research division, National Research Centre, Egypt.
- Ghada El Kamah: Head of Clinical Genetics department, Human Genetics and Genome Research division, National Research Centre, Egypt.
- Guida Landoure: The Laboratory Neurogenetics, Faculty of Medicine and Dentistry, Bamako, Mali.
- Hanno Boltz: Insitute of Human Genetice, University Hospital of Cologne, Germany.
- Hans Hagen: Institut Pasteur Paris, France.
- Inas Mazen: Clinical Genetics department, Human Genetics and Genome Research division, National Research Centre, Egypt.
- James Onyemata: institute of Human Virology, South Africa.
- Kenneth Fischbeck: Neurogenetics Branch at NINDS, National Academy of Science and NIH.
- Khalda Amr: Head of Medical Molecular department, Human Genetics and Genome Research division, National Research Centre, Egypt.
- Khaled Gaber: Head of the Prenatal Diagnoses and Fetal Medicine department, Human Genetics and Genome Research division, National Research Centre, Egypt
- Leon Mutesa: Human Genetics, College of Medicine and Health Science, Univerity of Rwanda.
- Maha Abdelfattah: Orodental Genetics department, Human Genetics and Genome Research division, National Research Centre, Egypt.
- Maha Zaki: Clinical Genetics department, Human Genetics and Genome Research division, National Research Centre, Egypt.

- Maximilian Muenke: National Human Genome Research Institute
- Misako Nakashima: Department of Stem Cell Biology and Regenerative Medicine, Nagoya University, Japan.
- Mohamed Abdelkader: Orodonal Genetics department, Human Genetics and Genome Research division, National Research Centre, Egypt.
- Mona Aglan: Clinical Genetics department, Human Genetics and Genome Research division, National Research Centre, Egypt.
- Mona Essawy: Medical Molecular Genetics department, Human Genetics and Genome Research division, National Research Centre, Egypt.
- Naglaa Kholousy: Head of the Immuno-Genetics department, Human Genetics and Genome Research division, National Research Centre, Egypt.
- Narazah Yusoff: Advanced Medical and Dental Institute (AMDI), University Sains Malaysia (USM).
- Nermeen Ahmad: Orodonal Genetics department, Human Genetics and Genome Research division, National Research Centre, Egypt.
- Olfat Shaker: Biochemistry department, Kasr AlAiny Faculty of Medicine, Cairo University
- Paul Ndebele: Medical Research Council of Zimbabwe (MRCZ)
- Prosper Lukusa Tshiloboo: Human genetics and Pediatrics, University of Kinshasa, Democratic Republic of Congo.
- Raj Ramesar: Division of Human Genetics, University of Cape Town, South Africa.
- Reham Aly: The Orodonal Research Division, National Research Centre, Egypt
- Ridha Barbouche: Immunology department, Medical School, University of Tunis.
- Rokhaya Ndiaye: Faculty of Medicine, Pharmacy and Dentistry, Sheikh Anta Diop University, Dakar, Senegal
- Said Aoufouchi: Genome Plasticity and Bcell Team, Gustave Roussy Cancer Center, Villejuif, France.
- Samar Kassim: Biochemistry and Molecular Biology, Faculty of Medicine, Ain Shams University, Egypt.
- Scott Williams: Department of Population and Quantitative Health Sciences,, Case Western Reserve University, USA.
- Shin Kwamata: Foundation for Biomedical Research and Innovation (FBRI) Center for Cell Therapy, Japan.
- Sonia Abdelhak: Research Laboratory on `biomedical Genomics and Oncogenetics, Istitut Pasteur, Tunis.
- Tarek Elbanouby: Plastic and Reconstructive Surgery, Al-Azhar University, Egypt.
- Yehia Gad: Medical Molecular department, Human Genetics and Genome Research division, National Research Centre, Egypt.
- Zilfalil Bin Alwi: Pediatrics and Clinical Genetics, Hospital University Sains Malaysia (USM).
